# Supplementary material for: Flower-like AgNPs@m-MgO as an excellent catalyst for CO2fixation and acylation reactions under ambient conditions
Source: Royal Society of Chemistry journal article supplement (doi:10.1039/c8nj02286k), 2018-01-01
Supplement: c8nj02286k1.pdf [file c8nj02286k1.pdf]

## Supporting Information

# Flowerlike AgNPs@m-MgO as an excellent catalyst for CO<sub>2</sub> fixation and acylation reactions under ambient conditions

Arpita Hazra Chowdhury, Swarbhanu Ghosh, Sk. Manirul Islam\*

*Department of Chemistry, University of Kalyani, Kalyani, Nadia, 741235, W.B., India*

---

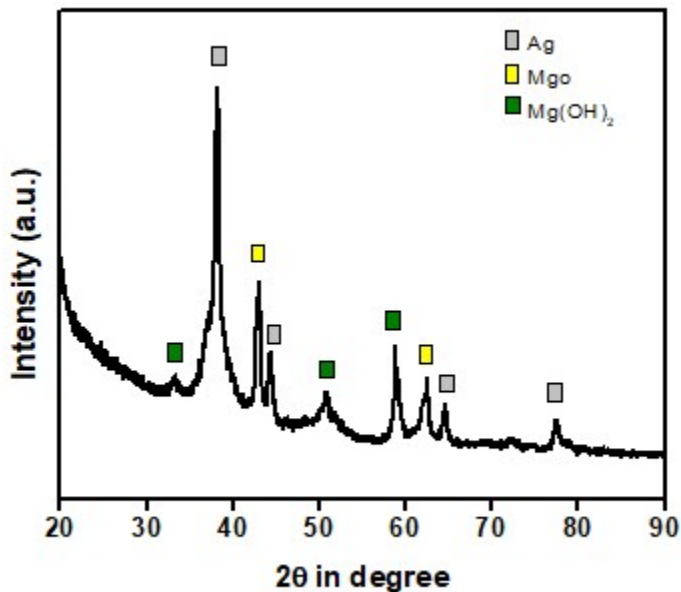

**Figure S1.** Powder XRD patterns of recycled AgNPs@m-MgO.

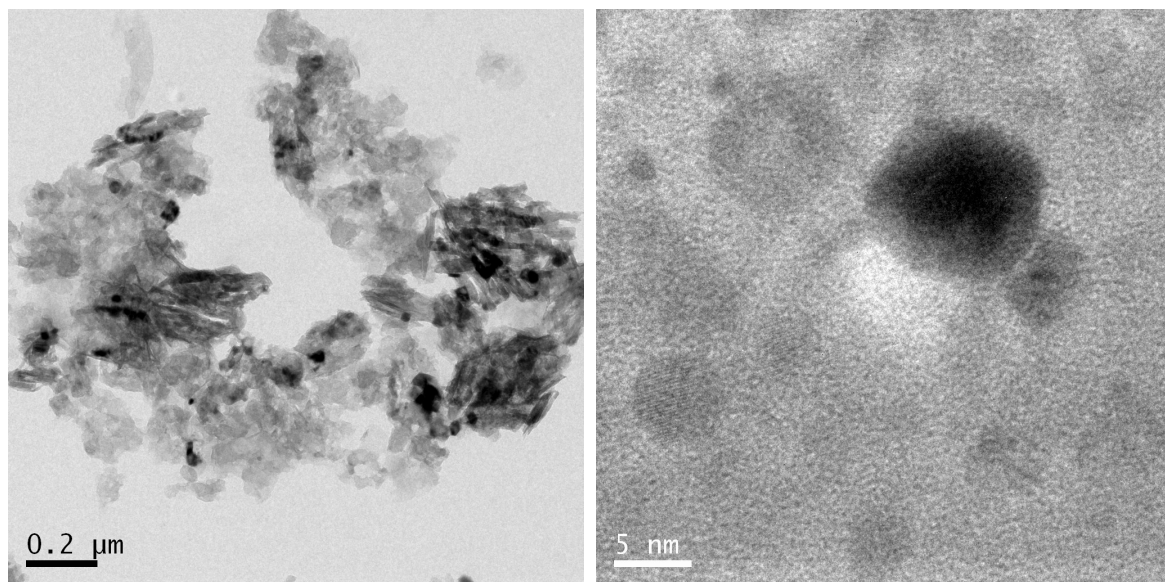

**Figure S2.** TEM images of recycled AgNPs@m-MgO.
